# Supplementary material for: Valence-shell ionization of acetyl cyanide: simulation of the photoelectron and infra-red spectra
Source: Royal Society of Chemistry journal article supplement (doi:10.1039/d2cp02674k), 2022-01-01
Supplement: d2cp02674k1.pdf [file d2cp02674k1.pdf]

# Valence-shell ionization of Acetyl cyanide: simulation of the photoelectron and infra-red spectra: Supporting informations

S. Carniato<sup>1,\*</sup>

<sup>1</sup>*Sorbonne Université, CNRS, Laboratoire de Chimie Physique-Matière et Rayonnement, 75005 Paris, France and*

*\*corresponding author: [stephane.carniato@upmc.fr](mailto:stephane.carniato@upmc.fr)*

## I. EXPERIMENTAL SPECTRA

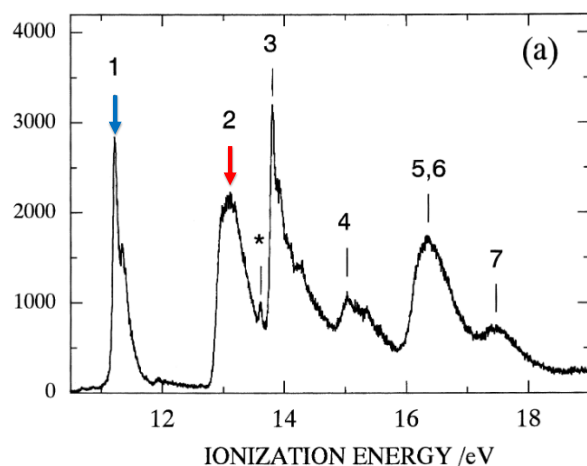

FIG. S1: Experimental photoelectron spectrum of acetyl cyanide taken from Ref.[1]. The blue (red) arrows indicate the two regions of interest corresponding to the  $15a'^{(-1)}$  and  $3a''^{(-1)}$  final states.

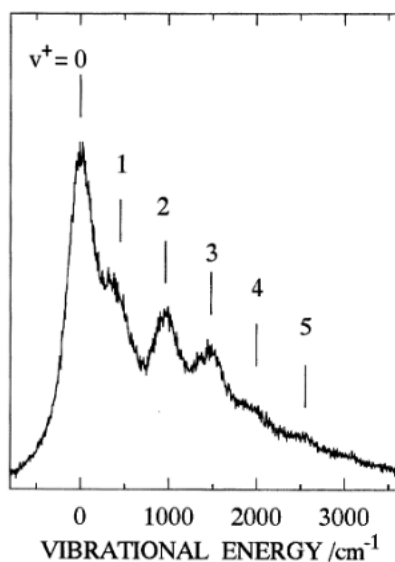

FIG. S2: Recorded photoelectron spectrum of the cationic  $15a'^{(-1)}$  electronic state of acetyl cyanide taken from Ref.[1] showing the vibrational profile extended over 3500 cm<sup>-1</sup>

## II. THEORETICAL SPECTRA

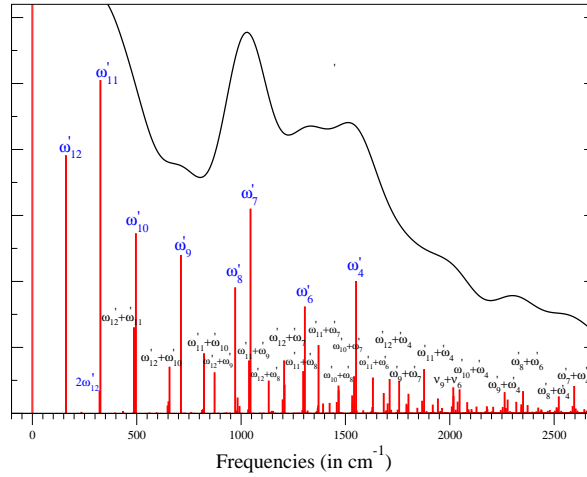

FIG. S3: Assignments of the most important vibrational bands in the satellite energy region (0-2500  $\text{cm}^{-1}$ ) of the  $15a'^{-1}$  photoelectron line.

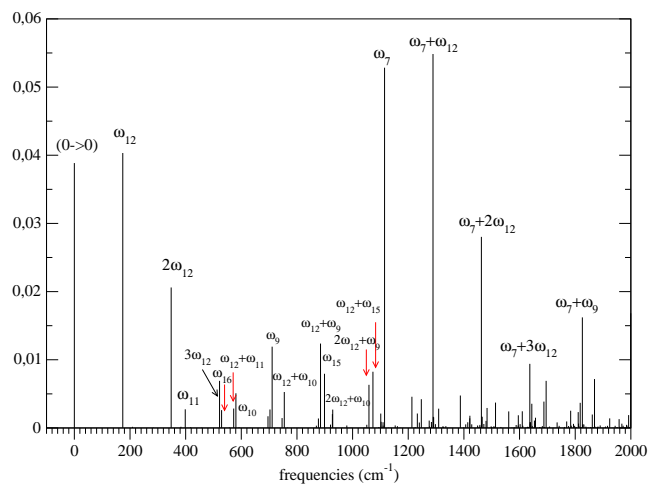

FIG. S4: Assignments of the most important vibrational bands in the satellite energy region (0-2000  $\text{cm}^{-1}$ ) of the  $3a''^{-1}$  photoelectron line.

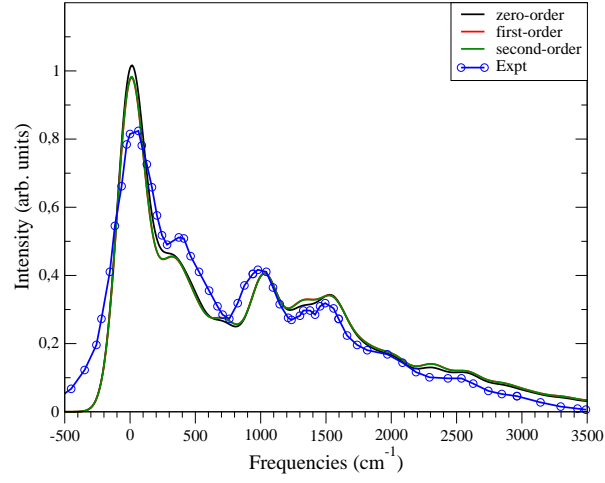

FIG. S5: Simulations at zero-order up to second order (restricted to diagonal terms) approximation of the dipole moment of the  $15a'^{-1}$  photoelectron line. Comparison with experiments is given. The broadening of the bands is fixed to 30 meV.

### III. THEORETICAL DETAILS

#### A. Intensities calculation: Zero-order approximation of the dipole moment

The cross-section  $\sigma(v',v)$  of the vibronic transition between the initial electronic state (denoted o) and the final electronic state (denoted f) is considered to be proportional to the square of the transition dipole matrix element:

$$\sigma(v', v) \propto |\langle \Psi_{v'}^{(f)} | \mu | \Psi_v^{(o)} \rangle|^2 \quad (\text{S1})$$

where  $|\Psi_v^{(o)}\rangle$  and  $|\Psi_{v'}^{(f)}\rangle$  are the vibronic wave-functions,  $\mu = \mu_o + \sum_{i=1}^{3N-6} [\frac{\partial \mu}{\partial Q_i}]_{Q_i=Q_{i,o}} (Q_i - Q_{o,i}) + \frac{1}{2!} \sum_{i=1}^{3N-6} \sum_{j=1}^{3N-6} [\frac{\partial^2 \mu}{\partial Q_i \partial Q_j}] (Q_i - Q_{o,i})(Q_j - Q_{o,j}) + \dots$  is the dipole moment operator,  $\mu_o$  is the dipole moment of the molecule at the equilibrium geometry,  $Q_i$  are the normal modes,  $\frac{\partial \mu}{\partial Q_i}$  ( $\frac{\partial^2 \mu}{\partial Q_i \partial Q_j}$ ) is the first (second) derivative of the dipole moment with respect to a deformation along the  $Q_i$  ( $Q_{i,j}$ ) mode(s) and  $v(v_1, v_2 \dots)/v' = (v'_1, v'_2 \dots)$  are the 3N-6 vibrational modes in the initial (o) and final (f) electronic states. The data have been modeled considering normal modes and frequencies for the initial neutral state and the final cation state, respectively. In first approximation, we assumed that the dipole moment is reduced to its zero order expression, e.g.  $\mu \approx \mu_o$ , such that  $\sigma(v',v)$  is restricted to the calculation of the overlap  $\langle \Psi_{v'}^{(f)} | \Psi_v^{(o)} \rangle$  matrix elements.

Let us consider that the vibrational wave function can be express by a product of 3N-6 one-dimensional harmonic oscillator. At the equilibrium geometry (denoted e), the ground state vibrational wave-function is written as a product of 3N-6 independent vibrational wave-functions (N is the number of atoms in the non linear molecule),

$$\Psi_v^{(o)}(\mathbf{R}) = \prod_{k=1}^{3N-6} \chi_{v_k}(Q_k - Q_{o,k}^e; \omega_k) \quad (\text{S2})$$

where  $\chi_{v_k}(Q_k - Q_{o,k}^e; \omega_k)$  is a normalized eigenfunction of an harmonic oscillator of reduced mass  $\mu_k$  centered at  $Q_{o,k}^e$  in a vibrational quantum number  $v_k$  undergoing vibration along the coordinate  $Q_k$  with frequency  $\omega_k$ .

For the final state, we applied a similar transformation where each  $l$ th normal mode of the final state (f) with frequency  $\omega'_l$  is considered displaced (minimum at  $Q'_{f,l}$ ) from the

ground state equilibrium position (minimum at  $Q_{f,l}^o$ ) and the vibrational wave-function is written as a product of 3N-6 vibrational wave-functions,

$$\Psi_{v'}^{(f)}(\mathbf{R}') = \prod_{l=1}^{3N-6} \chi_{v'_l}(Q'_l - Q_{f,l}^e; \omega'_l) \quad (\text{S3})$$

The vibrational wave-function is expressed as

$$\begin{aligned} \chi_{v'_k}(Q'_l - Q_{f,k}^e; \omega'_k) &= (2^{v'_k} v'_k!)^{-1/2} \left(\frac{\beta}{\pi}\right)^{1/4} \\ &e^{-\beta \frac{(Q'_l - Q_{f,k}^e)^2}{2}} H_{v'_k}[\beta^{1/2}(Q'_l - Q_{f,k}^e)] \end{aligned} \quad (\text{S4})$$

where  $H_{v'_k}[\zeta]$  is the Hermite polynomial defined as

$$\begin{aligned} H_{v'_k}[\zeta] &= (-1)^{v'_k} e^{\zeta^2} \frac{d^{v'_k}}{d\zeta^{v'_k}} (e^{-\zeta^2}) \\ &= (-1)^{v'_k} \sum_{j=\min}^{v'_k/2} [\gamma_{2j}] \zeta^{2j} \end{aligned} \quad (\text{S5})$$

with  $\zeta = \beta^{1/2}(Q'_l - Q_{f,l}^e)$  ( $Q_{f,l}^e$  is the equilibrium coordinate for the normal mode  $k$ ),  $\beta = \frac{\mu_k \omega'_k}{\hbar}$ , and  $\min=0$  or  $\min=\frac{1}{2}$  according to the parity (even or odd) of  $v'_k$ . The components  $\gamma_{2j}$  are given in Table S1.

After some manipulations, a general expression for the overlap between two displaced vibrational states for one normal mode  $Q_k$  with occupation numbers  $v'_k \geq (v_k = 0)$  can thus be written as

$$\begin{aligned} \langle \omega'_k, v'_k | \omega_k, 0 \rangle &= (-1)^{v'_k} (2^{v'_k} v'_k!)^{-1/2} \\ &\mu_k^{1/2} \frac{(\omega'_k \omega_k)^{1/4}}{(\hbar\pi)^{1/2}} e^{-[\mu_k \frac{\omega_k \omega'_k}{(\omega'_k + \omega_k)} \frac{(Q_{f,k}^e - Q_{o,k}^e)^2}{2\hbar}]} \\ &\sum_{j=\min}^{v'_k/2} [\gamma_{2j}] \int_{-\infty}^{\infty} [Q'_k + \frac{\omega_k (Q_{f,k}^e - Q_{o,k}^e)}{(\omega'_k + \omega_k)}]^{2j} \\ &e^{-\mu_k \frac{(\omega'_k + \omega_k) Q_k'^2}{2\hbar}} dQ'_k \end{aligned} \quad (\text{S6})$$

where in eq.6,  $Q'_k = [Q_k - \frac{(\omega'_k Q_{f,k}^e + \omega_k Q_{o,k}^e)}{(\omega'_k + \omega_k)}]$  and  $S_k = (RS_k)^2$  ( $RS_k = \sqrt{\frac{\mu_k \omega_k}{2\hbar}} (Q_{f,k}^e - Q_{o,k}^e)$ ) represents the coupling constant associated to the  $k$ th normal mode.

For a multi vibrational harmonic model in order to explicitly calculate the coupling constants, we considered here that the change in geometry between the neutral and final states can be described as a vector  $\Delta \mathbf{R}$ , whose 3N components are the changes in Cartesian

TABLE S1: Analytical Franck-Condon factors  $\text{FC}(\omega'_k, v'_k; \omega_k, 0)$  between two shifted harmonic PES with fundamental frequencies  $\omega_k$  and  $\omega'_k$ , respectively. For  $\alpha_{2j}$ , see text.

| $v_k$ | $v'_k$ | [ $\gamma_{2j}$ ] |            |            |            |            |                                                                                                                                                                                                                                          | FC                          |  |
|-------|--------|-------------------|------------|------------|------------|------------|------------------------------------------------------------------------------------------------------------------------------------------------------------------------------------------------------------------------------------------|-----------------------------|--|
|       |        | $\gamma_0$        | $\gamma_1$ | $\gamma_2$ | $\gamma_3$ | $\gamma_4$ | $\omega'_k \neq \omega_k$                                                                                                                                                                                                                | $\omega'_k = \omega_k$      |  |
| 0     | 0      | 1                 | 0          | 0          | 0          | 0          | $2A \frac{(\omega'_k \omega_k)^{1/2}}{(\omega'_k + \omega_k)}$                                                                                                                                                                           | $e^{-S_k}$                  |  |
| 0     | 1      | 0                 | -2         | 0          | 0          | 0          | $8A \frac{(\omega'_k \omega_k)^{3/2}}{(\omega'_k + \omega_k)^3} S_k$                                                                                                                                                                     | $S_k e^{-S_k}$              |  |
| 0     | -2     | -2                | 0          | 4          | 0          | 0          | $A \frac{(\omega'_k \omega_k)^{5/2}}{(\omega'_k + \omega_k)^5} \left[ \frac{(\omega'^2_k - \omega_k^2)}{(\omega'_k \omega_k)} + 4S_k \right]^2$                                                                                          | $\frac{S_k^2}{2} e^{-S_k}$  |  |
| 0     | 3      | 0                 | 12         | 0          | -8         | 0          | $\frac{4}{3} A S_k \left[ \frac{(\omega'_k \omega_k)^{7/2}}{(\omega'_k + \omega_k)^7} \right] \left[ 3 \frac{(\omega'^2_k - \omega_k^2)}{(\omega'_k \omega_k)} + 4S_k \right]^2$                                                         | $\frac{S_k^3}{6} e^{-S_k}$  |  |
| 0     | 4      | 12                | 0          | -48        | 0          | 16         | $\frac{3}{4} A \frac{(\omega'_k \omega_k)^{9/2}}{(\omega'_k + \omega_k)^9} \left[ \frac{16}{3} S_k^2 + 8S_k \frac{(\omega'_k - \omega_k)}{(\omega'_k \omega_k)^2} - \frac{(\omega'^2_k - \omega_k^2)}{(\omega'_k \omega_k)^2} \right]^2$ | $\frac{S_k^4}{24} e^{-S_k}$ |  |

$$A = A(\omega'_k, \omega_k) = e^{-2S_k \left( \frac{\omega'_k}{\omega'_k + \omega_k} \right)}; S_k = \mu_k \frac{(Q_{f,k}^e - Q_{o,k}^e)^2 \omega_k}{2\hbar}$$

$Q_{f,k}^e$  and  $Q_{o,k}^e$  are the equilibrium cartesian coordinates in the ground and ionized final states, respectively.

coordinates of the atoms in the molecule (see Ref.[2]). We convert this vector to an equivalent vector,  $\Delta \mathbf{R}'$  in mass-weighted coordinates by multiplying each component by the square root of the appropriate mass. This, in turn, can be written as a linear combination of the mass-weighted cartesian coordinates  $l_{k,j}$  of the vector  $l_j$ , where  $l_{k,j} = t_{k,j} m_j$ ,

$$\Delta \mathbf{R}' = \sum_{k=1}^{3N} \Delta Q_k \mathbf{l}_k \quad (\text{S7})$$

for each one-dimensional  $\Delta Q_k$  term associated to one normal mode  $k$  of the initial state, each component  $t_{k,j} = \frac{x_{k,j}}{\sqrt{m_j}}$  of  $k$ th normal mode delivered by GAMESS(US) package is multiplied by the appropriate atomic mass  $m_j$ .

In this case  $\Delta Q_k$  in length unit can be written as,

$$Q_k^e - Q_k^o = \delta Q_k = \frac{1}{\sqrt{\mu_k}} \sum_{j=1}^{3N} t_{k,j} m_j (X_f^e(j) - X_o^e(j)) \quad (\text{S8})$$

Here,  $X_f^e(j) - X_o^e(j)$  is the difference between the  $j$ th cartesian coordinates of the ionic

state and the neutral ground state and the formula used for  $S_k$  is

$$S_k = \frac{\mu_k \omega_k}{2\hbar} \delta Q_k^2 \quad (\text{S9})$$



## B. First and second order corrections of the dipole moment

For our purpose, we have reformulated the last term of the general expression ( $|\langle \phi_{v'_n}^{\omega'} | x | \phi_{v_m}^{\omega} \rangle|$ ) derived by Katriel[3] related to the dipole integrals, where the  $|\langle \phi_{v'_n}^{\omega'} | Q - Q_o | \phi_{v_m}^{\omega} \rangle|$  terms take the final form

$$|\langle \phi_{v'_n}^{\omega'} | Q - Q_o | \phi_{v_m}^{\omega} \rangle| = \frac{1}{\omega + \omega'} \sqrt{\frac{2\hbar}{\mu}} [\sqrt{n\omega'} I(\omega', n-1, \omega, m) + \sqrt{m\omega} I(\omega', n, \omega, m-1)] + I(\omega', n, \omega, m) \frac{\omega'(Q_e - Q_o)}{\omega + \omega'} \quad (\text{S10})$$

Here,  $I(\omega', n, \omega, m) = |\langle \phi_{v'_n}^{\omega'} | \phi_{v_m}^{\omega} \rangle|$  and  $I(\omega', n, \omega, m-1)$  and  $I(\omega', n-1, \omega, m)$  are valid for  $m \geq 1$  and  $n \geq 1$ , respectively. As a proof, we have fully analytically derived the three expressions, e.g.  $|\langle \phi_{v'_{n=0,1,2}}^{\omega'} | Q - Q_o | \phi_{v_m}^{\omega} \rangle|$  and we have compared them to eq. S10

$$1. \quad |\langle \phi_{n=0}^{\omega'} | Q - Q_o | \phi_{m=0}^{\omega} \rangle|$$

First let us write the fundamental ( $m=n=0$ ) vibrational wave-functions for the initial and final states

$$|\phi_{m=0}^{\omega} \rangle = \left(\frac{\mu\omega}{\pi\hbar}\right)^{1/4} e^{-\frac{\mu\omega}{2\hbar}(Q - Q_o)^2} \quad |\phi_{n=0}^{\omega'} \rangle = \left(\frac{\mu\omega'}{\pi\hbar}\right)^{1/4} e^{-\frac{\mu\omega'}{2\hbar}(Q - Q_e)^2} \quad (\text{S11})$$

The transition matrix element (TME) is given by

$$|\langle \phi_{n=0}^{\omega'} | (Q - Q_o) | \phi_{m=0}^{\omega} \rangle| = \left(\frac{\mu\omega}{\pi\hbar}\right)^{1/4} \left(\frac{\mu\omega'}{\pi\hbar}\right)^{1/4} \int_{-\infty}^{+\infty} e^{-\frac{\mu\omega'(Q-Q_e)^2}{2\hbar}} (Q - Q_o) e^{-\frac{\mu\omega(Q-Q_o)^2}{2\hbar}} dQ \quad (\text{S12})$$

Let us rearrange the integral part (denoted A) of TME

$$A = e^{-\frac{\alpha\beta(Q_o - Q_e)^2}{\alpha + \beta}} \int_{-\infty}^{+\infty} (Q - Q_o) e^{-(\alpha + \beta)[Q - \frac{(\alpha Q_e + \beta Q_o)}{\alpha + \beta}]^2} dQ \quad (\text{S13})$$

where  $\alpha = \frac{\mu\omega'}{2\hbar}$  and  $\beta = \frac{\mu\omega}{2\hbar}$

By changing variables, e.g.  $Q \rightarrow Q'$

$$Q' = Q - \frac{(\alpha Q_e + \beta Q_o)}{\alpha + \beta} \Rightarrow Q - Q_o = Q' + \frac{(\alpha Q_e + \beta Q_o)}{\alpha + \beta} - Q_o$$

$$Q - Q_o = Q' + \alpha \frac{(Q_e - Q_o)}{(\alpha + \beta)}$$
(S14)

Then, A can be written as

$$A = e^{-\frac{\mu\omega\omega'(Q_o - Q_e)^2}{2\hbar(\omega + \omega')}} \left( \int_{-\infty}^{+\infty} Q' e^{-(\alpha + \beta)Q'^2} dQ' + \left[ \alpha \frac{(Q_e - Q_o)}{(\alpha + \beta)} \right] \int_{-\infty}^{+\infty} e^{-(\alpha + \beta)Q'^2} dQ' \right)$$
(S15)

The first term of the integral vanishes for parity conditions and A takes the final form

$$A = e^{-\frac{\mu\omega\omega'(Q_o - Q_e)^2}{2\hbar(\omega + \omega')}} \left[ \alpha \frac{(Q_e - Q_o)}{(\alpha + \beta)} \right] \sqrt{\frac{2\pi\hbar}{\mu(\omega + \omega')}}$$
(S16)

Finally TME is given by

$$| \langle \phi_{n=0}^{\omega'} | (Q - Q_o) | \phi_{m=0}^{\omega} \rangle | = \left( \frac{\mu\omega}{\pi\hbar} \right)^{1/4} \left( \frac{\mu\omega'}{\pi\hbar} \right)^{1/4} e^{-\frac{\mu\omega\omega'(Q_o - Q_e)^2}{2\hbar(\omega + \omega')}} \sqrt{\frac{2\pi\hbar}{\mu(\omega + \omega')}} \left[ \frac{\omega'(Q_e - Q_o)}{(\omega + \omega')} \right]$$
(S17)

However, the product of the four first terms

$$\left( \frac{\mu\omega}{\pi\hbar} \right)^{1/4} \left( \frac{\mu\omega'}{\pi\hbar} \right)^{1/4} e^{-\frac{\mu\omega\omega'(Q_o - Q_e)^2}{2\hbar(\omega + \omega')}} \sqrt{\frac{2\pi\hbar}{\mu(\omega + \omega')}}$$
(S18)

corresponds to the  $I(\omega', 0, \omega, 0)$  overlap integral.

Then we can express TME in function  $I(\omega', 0, \omega, 0)$  to finally obtain

$$| \langle \phi_{n=0}^{\omega'} | (Q - Q_o) | \phi_{m=0}^{\omega} \rangle | = I(\omega', 0, \omega, 0) \frac{\omega'(Q_e - Q_o)}{\omega + \omega'}$$
(S19)

where this expression corresponds to the last term of eq. S10 for which  $n=m=0$ .

$$2. \quad | \langle \phi_{n=1}^{\omega'} | Q - Q_o | \phi_{m=0}^{\omega} \rangle |$$

Let us write first expressions of the fundamental ( $m=0, n=1$ ) vibrational wave-functions for the initial and final states

$$| \phi_{m=0}^{\omega} \rangle = \left( \frac{\mu\omega}{\pi\hbar} \right)^{1/4} e^{-\frac{\mu\omega(Q - Q_o)^2}{2\hbar}} \quad | \phi_{n=1}^{\omega'} \rangle = \frac{2}{\sqrt{2}} \left( \frac{\mu\omega'}{\pi\hbar} \right)^{1/4} \left( \frac{\mu\omega'}{\hbar} \right)^{1/2} (Q - Q_e) e^{-\frac{\mu\omega'(Q - Q_e)^2}{2\hbar}}$$
(S20)

The transition matrix element (TME) is written

$$| \langle \phi_{n=1}^{\omega'} | (Q - Q_o) | \phi_{m=0}^{\omega} \rangle | = \frac{2}{\sqrt{2}} \left( \frac{\mu\omega'}{\pi\hbar} \right)^{1/4} \left( \frac{\mu\omega}{\pi\hbar} \right)^{1/4} \left( \frac{\mu\omega'}{\hbar} \right)^{1/2} \int_{-\infty}^{+\infty} e^{-\frac{\mu\omega'(Q-Q_e)^2}{2\hbar}} (Q - Q_o)(Q - Q_e) e^{-\frac{\mu\omega(Q-Q_o)^2}{2\hbar}} dQ \quad (\text{S21})$$

Let us rearrange the integral part (denoted A) of TME

$$A = e^{-\frac{\alpha\beta(Q_o-Q_e)^2}{\alpha+\beta}} \int_{-\infty}^{+\infty} (Q - Q_o)(Q - Q_e) e^{-(\alpha+\beta)[Q - \frac{(\alpha Q_e + \beta Q_o)}{\alpha+\beta}]^2} dQ \quad (\text{S22})$$

By changing variables, e.g.  $Q \rightarrow Q'$

$$\begin{aligned} Q' &= Q - \frac{(\alpha Q_e + \beta Q_o)}{\alpha + \beta} \\ (Q - Q_e)(Q - Q_o) &= Q^2 - Q(Q_e + Q_o) + Q_o Q_e \\ \Rightarrow (Q - Q_e)(Q - Q_o) &= [Q' + \frac{(\alpha Q_e + \beta Q_o)}{\alpha + \beta}]^2 - [Q' + \frac{(\alpha Q_e + \beta Q_o)}{\alpha + \beta}](Q_e + Q_o) + Q_o Q_e \\ Q'^2 + 2Q' \frac{(\alpha Q_e + \beta Q_o)}{\alpha + \beta} + [\frac{(\alpha Q_e + \beta Q_o)}{\alpha + \beta}]^2 - Q'(Q_e + Q_o) - \frac{(\alpha Q_e + \beta Q_o)}{\alpha + \beta}(Q_e + Q_o) + Q_o Q_e & \end{aligned} \quad (\text{S23})$$

A can be written as

$$A = e^{-\frac{\alpha\beta(Q_o-Q_e)^2}{\alpha+\beta}} \int_{-\infty}^{+\infty} [Q'^2 + 2Q' \frac{(\alpha Q_e + \beta Q_o)}{\alpha + \beta} + [\frac{(\alpha Q_e + \beta Q_o)}{\alpha + \beta}]^2 - Q'(Q_e + Q_o) - \frac{(\alpha Q_e + \beta Q_o)}{\alpha + \beta}(Q_e + Q_o) + Q_o Q_e] e^{-(\alpha+\beta)Q'^2} dQ' \quad (\text{S24})$$

after some manipulations, and ignoring  $Q'$  odd terms,

$$A = e^{-\frac{\mu\omega\omega'(Q_o-Q_e)^2}{2\hbar(\omega+\omega')}} \sqrt{\frac{2\pi\hbar}{\mu(\omega+\omega')}} \left[ \frac{\hbar}{\mu(\omega+\omega')} + \left( \frac{\omega'Q_e + \omega Q_o}{\omega + \omega'} \right)^2 - \left( \frac{\omega'Q_e + \omega Q_o}{\omega + \omega'} \right) (Q_e + Q_o) + Q_e Q_o \right] \quad (\text{S25})$$

Finally the expression of the dipole integral  $| \langle \phi_{n=1}^{\omega'} | Q - Q_o | \phi_{m=0}^{\omega} \rangle |$  is,

$$| \langle \phi_{n=1}^{\omega'} | Q - Q_o | \phi_{m=0}^{\omega} \rangle | = \frac{2}{\sqrt{2}} \left( \frac{\mu\omega'}{\pi\hbar} \right)^{1/4} \left( \frac{\mu\omega}{\pi\hbar} \right)^{1/4} \left( \frac{\mu\omega'}{\hbar} \right)^{1/2} e^{-\frac{\mu\omega\omega'(Q_o-Q_e)^2}{2\hbar(\omega+\omega')}} \sqrt{\frac{2\pi\hbar}{\mu(\omega+\omega')}} \left[ \frac{\hbar}{\mu(\omega+\omega')} + \left( \frac{\omega'Q_e + \omega Q_o}{\omega + \omega'} \right)^2 - \left( \frac{\omega'Q_e + \omega Q_o}{\omega + \omega'} \right) (Q_e + Q_o) + Q_e Q_o \right] \quad (\text{S26})$$

It can be easily shown that

$$\left(\frac{\omega'Q_e + \omega Q_o}{\omega + \omega'}\right)^2 - \left(\frac{\omega'Q_e + \omega Q_o}{\omega + \omega'}\right)(Q_e + Q_o) + Q_e Q_o = -\omega\omega' \left[\frac{(Q_e - Q_o)}{(\omega + \omega')}\right]^2 \quad (\text{S27})$$

and eq. S26 can be thus reduced to the final form

$$|\langle \phi_{n=1}^{\omega'} | Q - Q_o | \phi_{m=0}^{\omega} \rangle| = \frac{2}{\sqrt{2}} \left(\frac{\mu\omega'}{\pi\hbar}\right)^{1/4} \left(\frac{\mu\omega}{\pi\hbar}\right)^{1/4} \left(\frac{\mu\omega'}{\hbar}\right)^{1/2} e^{-\frac{\mu\omega\omega'(Q_o - Q_e)^2}{2\hbar(\omega + \omega')}} \sqrt{\frac{2\pi\hbar}{\mu(\omega + \omega')}} \left[\frac{\hbar}{\mu(\omega + \omega')} - \omega\omega' \left[\frac{(Q_e - Q_o)}{(\omega + \omega')}\right]^2\right] \quad (\text{S28})$$

Considering now eq. S10 we have,

$$|\langle \phi_{n=1}^{\omega'} | Q - Q_o | \phi_{m=0}^{\omega} \rangle| = \frac{1}{\omega + \omega'} \sqrt{\frac{2\hbar}{\mu}} [\sqrt{\omega'} I(\omega', 0, \omega, 0)] + I(\omega', 1, \omega, 0) \frac{\omega'(Q_e - Q_o)}{\omega + \omega'} \quad (\text{S29})$$

Inserting the expression of  $I(\omega', 0, \omega, 0)$  and  $I(\omega', 1, \omega, 0)$  into S29

$$I(\omega', 0, \omega, 0) = \left(\frac{\mu\omega'}{\pi\hbar}\right)^{1/4} \left(\frac{\mu\omega}{\pi\hbar}\right)^{1/4} e^{-\frac{\mu\omega\omega'(Q_o - Q_e)^2}{2\hbar(\omega + \omega')}} \sqrt{\frac{2\pi\hbar}{\mu(\omega + \omega')}} \quad (\text{S30})$$

$$I(\omega', 1, \omega, 0) = \frac{2}{\sqrt{2}} \left(\frac{\mu\omega'}{\pi\hbar}\right)^{1/4} \left(\frac{\mu\omega}{\pi\hbar}\right)^{1/4} \left(\frac{\mu\omega'}{\hbar}\right)^{1/2} e^{-\frac{\mu\omega\omega'(Q_o - Q_e)^2}{2\hbar(\omega + \omega')}} \sqrt{\frac{2\pi\hbar}{\mu(\omega + \omega')}} \omega \frac{(Q_o - Q_e)}{(\omega + \omega')}$$

we find

$$|\langle \phi_{n=1}^{\omega'} | Q - Q_o | \phi_{m=0}^{\omega} \rangle| = \left(\frac{\mu\omega'}{\pi\hbar}\right)^{1/4} \left(\frac{\mu\omega}{\pi\hbar}\right)^{1/4} e^{-\frac{\mu\omega\omega'(Q_o - Q_e)^2}{2\hbar(\omega + \omega')}} \sqrt{\frac{2\pi\hbar}{\mu(\omega + \omega')}} \left[\frac{1}{\omega + \omega'} \sqrt{\frac{2\hbar\omega'}{\mu}} - \frac{2}{\sqrt{2}} \left(\frac{\mu\omega'}{\hbar}\right)^{1/2} \omega\omega' \left[\frac{(Q_e - Q_o)}{(\omega + \omega')}\right]^2\right] \quad (\text{S31})$$

and thus eq. S31 is similar to eq. S28

$$3. \quad |\langle \phi_{n=0}^{\omega'} | Q - Q_o | \phi_{m=1}^{\omega} \rangle|$$

Let us write first expressions of the fundamental (m=1,n=0) vibrational wave-functions for the initial and final states

$$|\phi_{n=0}^{\omega'} \rangle = \left(\frac{\mu\omega'}{\pi\hbar}\right)^{1/4} e^{-\frac{\mu\omega'(Q - Q_o)^2}{2\hbar}} \quad |\phi_{m=1}^{\omega} \rangle = \frac{2}{\sqrt{2}} \left(\frac{\mu\omega}{\pi\hbar}\right)^{1/4} \left(\frac{\mu\omega}{\hbar}\right)^{1/2} (Q - Q_e) e^{-\frac{\mu\omega(Q - Q_e)^2}{2\hbar}} \quad (\text{S32})$$

The first-order transition matrix element (TME) is written

$$| \langle \phi_{n=0}^{\omega'} | (Q - Q_o) | \phi_{m=1}^{\omega} \rangle | = \frac{2}{\sqrt{2}} \left( \frac{\mu\omega'}{\pi\hbar} \right)^{1/4} \left( \frac{\mu\omega}{\pi\hbar} \right)^{1/4} \left( \frac{\mu\omega}{\hbar} \right)^{1/2} \int_{-\infty}^{+\infty} e^{-\frac{\mu\omega'(Q-Q_e)^2}{2\hbar}} (Q - Q_o)^2 e^{-\frac{\mu\omega(Q-Q_o)^2}{2\hbar}} dQ \quad (\text{S33})$$

Using the same procedure as we find,

$$| \langle \phi_{n=0}^{\omega'} | Q - Q_o | \phi_{m=1}^{\omega} \rangle | = \frac{2}{\sqrt{2}} \left( \frac{\mu\omega'}{\pi\hbar} \right)^{1/4} \left( \frac{\mu\omega}{\pi\hbar} \right)^{1/4} \left( \frac{\mu\omega}{\hbar} \right)^{1/2} e^{-\frac{\mu\omega\omega'(Q_o-Q_e)^2}{2\hbar(\omega+\omega')}} \sqrt{\frac{2\pi\hbar}{\mu(\omega+\omega')}} \left[ \frac{\hbar}{\mu(\omega+\omega')} + \left( \frac{\omega'Q_e + \omega Q_o}{\omega+\omega'} \right)^2 - 2 \left( \frac{\omega'Q_e + \omega Q_o}{\omega+\omega'} \right) Q_o + Q_o^2 \right] \quad (\text{S34})$$

where

$$\left( \frac{\omega'Q_e + \omega Q_o}{\omega+\omega'} \right)^2 - 2 \left( \frac{\omega'Q_e + \omega Q_o}{\omega+\omega'} \right) Q_o + Q_o^2 = \frac{\omega'^2(Q_e - Q_o)^2}{(\omega+\omega')^2} \quad (\text{S35})$$

Then we obtain

$$| \langle \phi_{n=0}^{\omega'} | Q - Q_o | \phi_{m=1}^{\omega} \rangle | = \frac{2}{\sqrt{2}} \left( \frac{\mu\omega'}{\pi\hbar} \right)^{1/4} \left( \frac{\mu\omega}{\pi\hbar} \right)^{1/4} \left( \frac{\mu\omega}{\hbar} \right)^{1/2} e^{-\frac{\mu\omega\omega'(Q_o-Q_e)^2}{2\hbar(\omega+\omega')}} \sqrt{\frac{2\pi\hbar}{\mu(\omega+\omega')}} \left[ \frac{\hbar}{\mu(\omega+\omega')} + \frac{\omega'^2(Q_e - Q_o)^2}{(\omega+\omega')^2} \right] \quad (\text{S36})$$

After simplifications and introducing the expressions  $I(\omega', 0, \omega, 0)$  and  $I(\omega', 0, \omega, 1)$  we find as expected a final expression corresponding to S10.

$$| \langle \phi_{n=0}^{\omega'} | Q - Q_o | \phi_{m=1}^{\omega} \rangle | = \frac{1}{\omega+\omega'} \sqrt{\frac{2\hbar}{\mu}} \left[ \sqrt{\omega} I(\omega', 0, \omega, 0) + I(\omega', 0, \omega, 1) \frac{\omega'(Q_e - Q_o)}{\omega+\omega'} \right] \quad (\text{S37})$$

where

$$I(\omega', 0, \omega, 1) = \frac{2}{\sqrt{2}} \left( \frac{\mu\omega'}{\pi\hbar} \right)^{1/4} \left( \frac{\mu\omega}{\pi\hbar} \right)^{1/4} \left( \frac{\mu\omega}{\hbar} \right)^{1/2} e^{-\frac{\mu\omega\omega'(Q_o-Q_e)^2}{2\hbar(\omega+\omega')}} \sqrt{\frac{2\pi\hbar}{\mu(\omega+\omega')}} \frac{\omega'(Q_e - Q_o)}{\omega+\omega'} \quad (\text{S38})$$

$$4. \quad | \langle \phi_{n=2}^{\omega'} | Q - Q_o | \phi_{m=0}^{\omega} \rangle |$$

Let us write first expressions of the fundamental (m=0,n=2) vibrational wave-functions for the initial and final states

$$| \phi_{m=0}^{\omega} \rangle = \left( \frac{\mu\omega}{\pi\hbar} \right)^{1/4} e^{-\frac{\mu\omega(Q-Q_o)^2}{2\hbar}} \quad | \phi_{n=2}^{\omega'} \rangle = \frac{1}{\sqrt{2}} \left( \frac{\mu\omega'}{\pi\hbar} \right)^{1/4} \left[ -1 + \frac{2\mu\omega'}{\hbar} (Q - Q_e)^2 \right] e^{-\frac{\mu\omega'(Q-Q_e)^2}{2\hbar}} \quad (\text{S39})$$

The first-order transition matrix element (TME) is written

$$| \langle \phi_{n=2}^{\omega'} | Q - Q_o | \phi_{m=0}^{\omega} \rangle | = \frac{1}{\sqrt{2}} \left( \frac{\mu\omega}{\pi\hbar} \right)^{1/4} \left( \frac{\mu\omega'}{\pi\hbar} \right)^{1/4} e^{-\frac{\mu\omega\omega'(Q_o-Q_e)^2}{2\hbar(\omega+\omega')}} \sqrt{\frac{2\pi\hbar}{\mu(\omega+\omega')}} \left[ -\frac{\omega'}{(\omega+\omega')} (Q_e - Q_o) \right. \\ \left. + \left[ \frac{2\mu\omega'}{\hbar} \right] \left[ \left( \frac{3B\hbar}{\mu(\omega+\omega')} + B^3 - 2B^2Q_e - 2\frac{\pi\hbar Q_e}{\mu(\omega+\omega')} + BQ_e^2 - \left( \frac{\hbar Q_o}{\mu(\omega+\omega')} + B^2Q_o^2 \right) + 2BQ_oQ_e - Q_oQ_e^2 \right] \right] \quad (\text{S40})$$

$$\text{with } B = \frac{\omega'Q_e + \omega Q_o}{(\omega + \omega')}$$

$$5. \quad | \langle \phi_{n=0}^{\omega'} | (Q - Q_o)^2 | \phi_{m=0}^{\omega} \rangle |$$

$$| \phi_{n=0}^{\omega'} \rangle = \left( \frac{\mu\omega'}{\pi\hbar} \right)^{1/4} e^{-\frac{\mu\omega'(Q-Q_e)^2}{2\hbar}} \quad | \phi_{m=0}^{\omega} \rangle = \left( \frac{\mu\omega}{\pi\hbar} \right)^{1/4} e^{-\frac{\mu\omega(Q-Q_o)^2}{2\hbar}} \quad (\text{S41})$$

$$| \langle \phi_{n=0}^{\omega'} | (Q - Q_o)^2 | \phi_{m=0}^{\omega} \rangle | = \left( \frac{\mu\omega}{\pi\hbar} \right)^{1/4} \left( \frac{\mu\omega'}{\pi\hbar} \right)^{1/4} \int_{-\infty}^{+\infty} e^{-\frac{\mu\omega'(Q-Q_e)^2}{2\hbar}} (Q - Q_o)^2 e^{-\frac{\mu\omega(Q-Q_o)^2}{2\hbar}} dQ \quad (\text{S42})$$

Let us write rearrange the integral part (denoted A) of TME

$$A = e^{-\frac{\alpha\beta(Q_o-Q_e)^2}{\alpha+\beta}} \int_{-\infty}^{+\infty} (Q - Q_o)^2 e^{-(\alpha+\beta)[Q - \frac{(\alpha Q_e + \beta Q_o)}{\alpha+\beta}]^2} dQ \quad (\text{S43})$$

By changing variables

$$Q' = Q - \frac{(\alpha Q_e + \beta Q_o)}{\alpha + \beta} \\ (Q - Q_o)^2 = Q'^2 - 2Q'Q_o + Q_o^2 \quad (\text{S44}) \\ \Rightarrow (Q - Q_o)^2 = \left[ Q' + \frac{(\alpha Q_e + \beta Q_o)}{\alpha + \beta} \right]^2 - 2 \left[ Q' + \frac{(\alpha Q_e + \beta Q_o)}{\alpha + \beta} \right] + Q_o^2$$

and introducing eq.S44 into A we obtain the following expression,

$$A = e^{-\frac{\mu\omega\omega'(Q_o-Q_e)^2}{2\hbar(\omega+\omega')}} \sqrt{\frac{2\pi\hbar}{\mu(\omega+\omega')}} \left[ \frac{\hbar}{\mu(\omega+\omega')} + \left(\frac{\omega'Q_e + \omega Q_o}{\omega+\omega'}\right)^2 - 2\left(\frac{\omega'Q_e + \omega Q_o}{\omega+\omega'}\right)Q_o + Q_o^2 \right] \quad (\text{S45})$$

and finally, using eq.S34, we find that the second-order transition matrix element (TME) takes the final form

$$\begin{aligned} |\langle \phi_{n=0}^{\omega'} | (Q - Q_o)^2 | \phi_{m=0}^{\omega} \rangle| &= \left(\frac{\mu\omega}{\pi\hbar}\right)^{1/4} \left(\frac{\mu\omega'}{\pi\hbar}\right)^{1/4} e^{-\frac{\mu\omega\omega'(Q_o-Q_e)^2}{2\hbar(\omega+\omega')}} \sqrt{\frac{2\pi\hbar}{\mu(\omega+\omega')}} \left[ \frac{\hbar}{\mu(\omega+\omega')} + \left(\frac{\omega'Q_e + \omega Q_o}{\omega+\omega'}\right)^2 \right. \\ &\quad \left. - 2\left(\frac{\omega'Q_e + \omega Q_o}{\omega+\omega'}\right)Q_o + Q_o^2 \right] \\ &= \frac{\sqrt{2}}{2} \left(\frac{\hbar}{\mu\omega}\right)^{1/2} |\langle \phi_{n=0}^{\omega'} | Q - Q_o | \phi_{m=1}^{\omega} \rangle| \end{aligned} \quad (\text{S46})$$

$$6. \quad |\langle \phi_{n=1}^{\omega'} | (Q - Q_o)^2 | \phi_{m=0}^{\omega} \rangle|$$

Let us write first expressions of the fundamental (m=0,n=1) vibrational wave-functions for the initial and final states

$$|\phi_{m=0}^{\omega}\rangle = \left(\frac{\mu\omega}{\pi\hbar}\right)^{1/4} e^{-\frac{\mu\omega(Q-Q_o)^2}{2\hbar}} \quad |\phi_{n=1}^{\omega'}\rangle = \frac{2}{\sqrt{2}} \left(\frac{\mu\omega'}{\pi\hbar}\right)^{1/4} \left(\frac{\mu\omega'}{\hbar}\right)^{1/2} (Q - Q_e) e^{-\frac{\mu\omega'(Q-Q_e)^2}{2\hbar}} \quad (\text{S47})$$

The transition matrix element (TME) is written

$$\begin{aligned} |\langle \phi_{n=1}^{\omega'} | (Q - Q_o)^2 | \phi_{m=0}^{\omega} \rangle| &= \frac{2}{\sqrt{2}} \left(\frac{\mu\omega}{\pi\hbar}\right)^{1/4} \left(\frac{\mu\omega'}{\pi\hbar}\right)^{1/4} \left(\frac{\mu\omega'}{\hbar}\right)^{1/2} \int_{-\infty}^{+\infty} e^{-\frac{\mu\omega'(Q-Q_e)^2}{2\hbar}} \\ &\quad (Q - Q_o)^2 (Q - Q_e) e^{-\frac{\mu\omega(Q-Q_o)^2}{2\hbar}} dQ \end{aligned} \quad (\text{S48})$$

Let us rearrange the integral part (denoted A) of TME

$$A = e^{-\frac{\alpha\beta(Q_o-Q_e)^2}{\alpha+\beta}} \int_{-\infty}^{+\infty} (Q - Q_o)^2 (Q - Q_e) e^{-(\alpha+\beta)\left[Q - \frac{(\alpha Q_e + \beta Q_o)}{\alpha+\beta}\right]^2} dQ \quad (\text{S49})$$

By changing variables

$$\begin{aligned}
Q' &= Q - \frac{(\alpha Q_e + \beta Q_o)}{\alpha + \beta} \\
(Q - Q_o)^2 &= Q'^2 + 2Q' \frac{(\alpha Q_e + \beta Q_o)}{\alpha + \beta} + \left[ \frac{(\alpha Q_e + \beta Q_o)}{\alpha + \beta} \right]^2 \\
&\quad - 2Q'Q_o - 2 \frac{(\alpha Q_e + \beta Q_o)}{\alpha + \beta} Q_o + Q_o^2 \\
(Q - Q_o)^2 &= Q'^2 + 2BQ' + B^2 - 2Q'Q_o - 2BQ_o + Q_o^2 \quad (\text{S50}) \\
Q - Q_e &= \left[ Q' + \frac{(\alpha Q_e + \beta Q_o)}{\alpha + \beta} \right] - Q_e = Q' + B - Q_e \\
(Q - Q_e)(Q - Q_o)^2 &= Q'^3 + BQ'^2 - Q_e Q'^2 + 2BQ'^2 + 2Q'B^2 - 2Q'BQ_e \\
&\quad - 2Q_o Q'^2 - 2Q'Q_o B + 2Q'Q_o Q_e - 2BQ'Q_o - 2B^2 Q_o \\
&\quad + 2BQ_o Q_e + Q'Q_o^2 + BQ_o^2 - Q_e Q_o^2 + Q'B^2 + B^3 - Q_e B^2
\end{aligned}$$

Then A can be written as

$$\begin{aligned}
A = e^{-\frac{\alpha\beta(Q_o - Q_e)^2}{\alpha + \beta}} \sqrt{\frac{2\hbar\pi}{\mu(\omega + \omega')}} & \left[ (3B - 2Q_o - Q_e) \frac{\hbar}{\mu(\omega + \omega')} + B^3 - B^2(2Q_o + Q_e) + B(2Q_o Q_e + Q_o^2) \right. \\
& \left. - Q_e Q_o^2 \right] \quad (\text{S51})
\end{aligned}$$

and the second-order transition matrix element (TME) takes the expression

$$\begin{aligned}
| \langle \phi_{n=1}^{\omega'} | (Q - Q_o)^2 | \phi_{m=0}^{\omega} \rangle | &= \frac{2}{\sqrt{2}} \left( \frac{\mu\omega}{\pi\hbar} \right)^{1/4} \left( \frac{\mu\omega'}{\pi\hbar} \right)^{1/4} \left( \frac{\mu\omega'}{\hbar} \right)^{1/2} e^{-\frac{\mu\omega\omega'(Q_o - Q_e)^2}{2\hbar(\omega + \omega')}} \sqrt{\frac{2\pi\hbar}{\mu(\omega + \omega')}} \\
& \left[ (3B - 2Q_o - Q_e) \frac{\hbar}{\mu(\omega + \omega')} + B^3 - B^2(2Q_o + Q_e) + B(2Q_o Q_e + Q_o^2) - Q_e Q_o^2 \right] \quad (\text{S52})
\end{aligned}$$

with  $B = \frac{\omega' Q_e + \omega Q_o}{(\omega + \omega')}$

As in the previous case (see eq.S46), it can be shown (not reported here) that the  $| \langle \phi_{n=1}^{\omega'} | (Q - Q_o)^2 | \phi_{m=0}^{\omega} \rangle |$  term can be expressed in function  $| \langle \phi_{n=1}^{\omega'} | (Q - Q_o) | \phi_{m=1}^{\omega} \rangle |$ , such as

$$| \langle \phi_{n=1}^{\omega'} | (Q - Q_o)^2 | \phi_{m=0}^{\omega} \rangle | = \frac{\sqrt{2}}{2} \left( \frac{\hbar}{\mu\omega} \right)^{1/2} | \langle \phi_{n=1}^{\omega'} | Q - Q_o | \phi_{m=1}^{\omega} \rangle | \quad (\text{S53})$$



$$7. \quad | \langle \phi_{n=2}^{\omega'} | (Q - Q_o)^2 | \phi_{m=0}^{\omega} \rangle |$$

Let us write again first expressions of the fundamental (m=0,n=2) vibrational wave-functions for the initial and final states

$$| \phi_{m=0}^{\omega'} \rangle = \left( \frac{\mu\omega'}{\pi\hbar} \right)^{1/4} e^{-\frac{\mu\omega'(Q - Q_o)^2}{2\hbar}} \quad | \phi_{n=2}^{\omega} \rangle = \frac{1}{\sqrt{2}} \left( \frac{\mu\omega'}{\pi\hbar} \right)^{1/4} \left[ -1 + \frac{2\mu\omega'}{\hbar} (Q - Q_e)^2 \right] e^{-\frac{\mu\omega'(Q - Q_e)^2}{2\hbar}} \quad (\text{S54})$$

After similar transformations, the second-order transition matrix element (TME) takes the final expression

$$\begin{aligned} | \langle \phi_{n=2}^{\omega'} | (Q - Q_o)^2 | \phi_{m=0}^{\omega} \rangle | &= -\frac{1}{\sqrt{2}} | \langle \phi_{n=0}^{\omega'} | (Q - Q_o)^2 | \phi_{m=0}^{\omega} \rangle | \\ &+ \frac{1}{\sqrt{2}} \left( \frac{\mu\omega}{\pi\hbar} \right)^{1/4} \left( \frac{\mu\omega'}{\pi\hbar} \right)^{1/4} \left( \frac{2\mu\omega'}{\hbar} \right) e^{-\frac{\mu\omega\omega'(Q_o - Q_e)^2}{2\hbar(\omega + \omega')}} \sqrt{\frac{2\pi\hbar}{\mu(\omega + \omega')}} \\ &\left[ \frac{3\hbar^2}{(\mu(\omega + \omega'))^2} + \frac{6\hbar B^2}{\mu(\omega + \omega')} + B^4 - \left( \frac{6\hbar B}{\mu(\omega + \omega')} + 2B^3 \right) (Q_e + Q_o) \right. \\ &\left. + \left( \frac{\hbar}{\mu(\omega + \omega')} + B^2 \right) (Q_e^2 + 4Q_e Q_o + Q_o^2) - 2B(Q_o Q_e^2 + Q_e Q_o^2) + Q_e^2 Q_o^2 \right] \end{aligned} \quad (\text{S55})$$

As in the previous case (see eqs. S46 and S53), it can be shown (not reported here) that the  $| \langle \phi_{n=2}^{\omega'} | (Q - Q_o)^2 | \phi_{m=0}^{\omega} \rangle |$  term can be expressed in function  $| \langle \phi_{n=2}^{\omega'} | (Q - Q_o) | \phi_{m=1}^{\omega} \rangle |$ , such as

The expressions  $| \langle \phi_n^{\omega'} | (Q - Q_o)^2 | \phi_{m=0}^{\omega} \rangle |$  can be generalized by the using the first-order  $| \langle \phi_n^{\omega'} | (Q - Q_o) | \phi_{m=1}^{\omega} \rangle |$  terms.

$$| \langle \phi_n^{\omega'} | (Q - Q_o)^2 | \phi_{m=0}^{\omega} \rangle | = | \langle \phi_n^{\omega'} | (Q - Q_o) | \phi_{m=1}^{\omega} \rangle | \frac{\sqrt{2}}{2} \sqrt{\frac{\hbar}{\mu\omega}} \quad (\text{S56})$$

where

$$\begin{aligned} | \langle \phi_n^{\omega'} | (Q - Q_o) | \phi_{m=1}^{\omega} \rangle | &= \frac{1}{\omega + \omega'} \sqrt{\frac{2\hbar}{\mu}} \left[ \sqrt{n\omega'} I(\omega', n - 1, \omega, 1) + \sqrt{\omega} I(\omega', n, \omega, 0) \right] \\ &+ I(\omega', n, \omega, 1) \frac{\omega'(Q_e - Q_o)}{\omega + \omega'} \end{aligned} \quad (\text{S57})$$

### C. Numerical calculations of the first and second order terms of the dipole moments

The first order derivatives of the dipole moment for each mode ( $\frac{\partial \mu}{\partial Q_k}$ ) was estimated considering small displacements around  $Q_{o,k}$ , such as  $\frac{\partial \mu}{\partial Q_k} \approx \frac{\mu_+ - \mu_-}{Q_{+,k} - Q_{-,k}}$  where

$$Q_{+,k} - Q_{-,k} = \frac{1}{\sqrt{\mu_k}} \sum_{j=1}^{3N} t_{k,j} m_j (x_{+,j} - x_{-,j}) \quad (\text{S58})$$

with the kth new coordinates ( $x_{\pm,k}(l, \delta)$ ) are obtained along a deformation along the  $Q_{o,l}$  mode from the equilibrium coordinates ( $x_{o,k}$ )

$$x_{\pm,k}(l, \delta) = x_{o,k} + \delta \cdot t_{l,k} \cdot \sqrt{\mu_l} \cdot Q_{o,l} \quad (\text{S59})$$

For modes (18,17,15,14,13),  $\delta$  was set to 1000. For modes (16),  $\delta$  was set to 100. For the rest modes,  $\delta$  was set to 0.1.

The second order derivatives of the dipole moment for each mode ( $\frac{\partial^2 \mu}{\partial Q_k^2}$ ) was estimated using eq.S10, such as

$$\frac{\partial^2 \mu}{\partial Q_k^2} \approx \frac{\mu(Q_o + \delta Q_k) + \mu(Q_o - \delta Q_k) - 2\mu_o}{\Delta Q_k^2} \quad (\text{S60})$$

where  $\mu(Q_o \pm \delta Q_k) = \mu(Q_{\pm,k}(\delta))$  and

$$\Delta Q_k = Q_{+,k}(\delta) - Q_{o,k} \quad (\text{S61})$$

$\mu_o$  is the dipole moment of the molecule at the equilibrium geometry.

- 
- [1] S. Katsumata, K. Tabayashi, T. Sugihara, K. Kimura, *J. of . Elect. Spectr. and Rel. Phenom.*, 2000, **49**, 113
  - [2] T. Darrah Thomas, L. J. Saethre, S. L. Sorensen and S. Svensson, *J. Chem. Phys.*, 1998, **109**, 1041.
  - [3] J. Katriel, *J. Phys. B: Atom. Molec. Phys.*, 1970, **3**, 1315

TABLE S2: Modes( $\omega_i$ ,  $i=1,3N-6$ ).  $Q_i$ ( $i=1,3N-6$ ) normal coordinates (in  $\text{\AA}$ ). Frequencies (in  $\text{cm}^{-1}$ ). In parenthesis, order of frequencies by increasing value. Derivatives (in Debye  $\text{\AA}^{-1}$ units ) and second derivatives (Debye  $\text{\AA}^{-2}$ ) of the Dipole moment. First-order (in  $\text{\AA}$ ( $\times 10^5$ )) and second-order (in  $\text{\AA}^2$  ( $\times 10^5$ )) components of the dipole.

| Mode <sub>i</sub> | $Q_{o,i}$ (in $\text{\AA}$ ) | $\omega_i$ | $\frac{\partial \mu}{\partial Q_i}$ | $\langle \omega'_i, 0 Q - Q_{o,i} \omega_i, 0 \rangle > (^{\circ})$ | $\langle \omega'_i, 1 Q - Q_{o,i} \omega_i, 0 \rangle > (^{\circ})$ | $\langle \omega'_i, 2 Q - Q_{o,i} \omega_i, 0 \rangle > (^{\circ})$ | $\frac{\partial^2 \mu}{\partial Q_i^2}$ | $\frac{1}{2} \langle \omega'_i, 0 (Q - Q_{o,i})^2 \omega_i, 0 \rangle > (^{\circ})$ | $\frac{1}{2} \langle \omega'_i, 1 (Q - Q_{o,i})^2 \omega_i, 0 \rangle > (^{\circ})$ | $\frac{1}{2} \langle \omega'_i, 2 (Q - Q_{o,i})^2 \omega_i, 0 \rangle > (^{\circ})$ |
|-------------------|------------------------------|------------|-------------------------------------|---------------------------------------------------------------------|---------------------------------------------------------------------|---------------------------------------------------------------------|-----------------------------------------|-------------------------------------------------------------------------------------|-------------------------------------------------------------------------------------|-------------------------------------------------------------------------------------|
| $\omega_{18}$     | -0.0003                      | 129 (1)    | 0.00                                | -14                                                                 | 35128                                                               | 21                                                                  | 0.008                                   | 6473                                                                                | -2                                                                                  | 8518                                                                                |
| $\omega_{17}$     | -0.0001                      | 245 (3)    | 0.00                                | 1                                                                   | 8852                                                                | -1                                                                  | -0.390                                  | 417                                                                                 | 0                                                                                   | 536                                                                                 |
| $\omega_{16}$     | -0.0022                      | 596 (5)    | 0.00                                | 3523                                                                | 7915                                                                | -5264                                                               | 0.724                                   | 591                                                                                 | 113                                                                                 | 495                                                                                 |
| $\omega_{15}$     | 0.0001                       | 1049 (9)   | 0.00                                | 3107                                                                | 8166                                                                | -4188                                                               | 0.264                                   | 504                                                                                 | 132                                                                                 | 529                                                                                 |
| $\omega_{14}$     | 0.0008                       | 1468 (13)  | 0.00                                | -3                                                                  | 10473                                                               | 4                                                                   | 0.836                                   | 557                                                                                 | 0                                                                                   | 769                                                                                 |
| $\omega_{13}$     | 0.0003                       | 3086 (17)  | 0.00                                | 0                                                                   | 7046                                                                | 0                                                                   | -0.652                                  | 250                                                                                 | 0                                                                                   | 350                                                                                 |
| $\omega_{12}$     | 0.3230                       | 177 (2)    | 1.16                                | 5381                                                                | 8517                                                                | -7219                                                               | 0.744                                   | 908                                                                                 | -225                                                                                | 652                                                                                 |
| $\omega_{11}$     | -2.2169                      | 437(4)     | 0.77                                | -4238                                                               | 6046                                                                | 6321                                                                | -0.080                                  | 592                                                                                 | -78                                                                                 | 327                                                                                 |
| $\omega_{10}$     | -1.0770                      | 599 (6)    | -0.02                               | 3                                                                   | 5833                                                                | -4                                                                  | 0.418                                   | 175                                                                                 | 0                                                                                   | 237                                                                                 |
| $\omega_9$        | -5.0203                      | 715 (7)    | -1.22                               | 2546                                                                | 5671                                                                | -3348                                                               | 1.263                                   | 273                                                                                 | 76                                                                                  | 265                                                                                 |
| $\omega_8$        | -1.9134                      | 985 (8)    | 1.13                                | -1                                                                  | 8716                                                                | 1                                                                   | 0.635                                   | 396                                                                                 | 0                                                                                   | 526                                                                                 |
| $\omega_7$        | -0.0298                      | 1193 (10)  | -0.25                               | 2654                                                                | 5067                                                                | -3742                                                               | 2.272                                   | 270                                                                                 | 61                                                                                  | 215                                                                                 |
| $\omega_6$        | 0.2854                       | 1398 (11)  | -1.00                               | 2891                                                                | 8249                                                                | -4081                                                               | 1.355                                   | 504                                                                                 | 115                                                                                 | 525                                                                                 |
| $\omega_5$        | -0.6758                      | 1458 (12)  | -0.20                               | 928                                                                 | 10329                                                               | -1352                                                               | 1.110                                   | 561                                                                                 | 45                                                                                  | 751                                                                                 |
| $\omega_4$        | -2.6355                      | 1776 (14)  | -0.74                               | -1011                                                               | 2295                                                                | 1461                                                                | 1.042                                   | 47                                                                                  | -10                                                                                 | 42                                                                                  |
| $\omega_3$        | -1.2758                      | 2323 (15)  | 0.94                                | -243                                                                | 2347                                                                | 343                                                                 | 0.358                                   | 28                                                                                  | -3                                                                                  | 39                                                                                  |
| $\omega_2$        | -1.7862                      | 3031 (16)  | -0.14                               | -235                                                                | 7308                                                                | 337                                                                 | -0.409                                  | 270                                                                                 | -8                                                                                  | 376                                                                                 |
| $\omega_1$        | -0.3301                      | 3146 (18)  | 0.22                                | 227                                                                 | 6951                                                                | -320                                                                | -0.658                                  | 242                                                                                 | 7                                                                                   | 342                                                                                 |
